# Supplementary material for: Acceptor–donor–acceptor type molecules for high performance organic photovoltaics – chemistry and mechanism
Source: Royal Society of Chemistry journal article supplement (doi:10.1039/d0cs00084a), 2020-01-01
Supplement: d0cs00084a1.pdf [file d0cs00084a1.pdf]

## Electronic Supplementary Information

### Acceptor-donor-acceptor type molecules for high performance organic photovoltaics – chemistry and mechanism

Xiangjian Wan,<sup>a-c</sup> Chenxi Li,<sup>a</sup> Mingtao Zhang,<sup>a</sup> Yongsheng Chen <sup>\*a-c</sup>

<sup>a</sup> The Centre of Nanoscale Science and Technology and Key Laboratory of Functional Polymer Materials, Institute of Polymer Chemistry, College of Chemistry, Nankai University, Tianjin 300071, China

<sup>b</sup> State Key Laboratory of Elemento-Organic Chemistry, Nankai University, Tianjin, 300071, China

<sup>c</sup> Renewable Energy Conversion and Storage Center (RECAST), Nankai University, Tianjin 300071, China

#### 1. HOMO/LUMO calculation and analysis for some A-D-A molecules

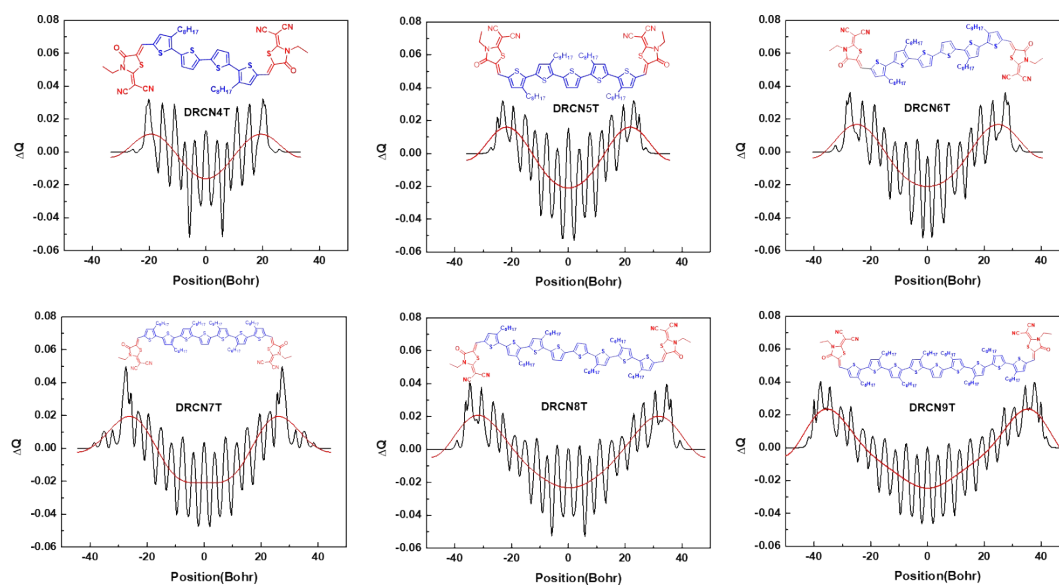

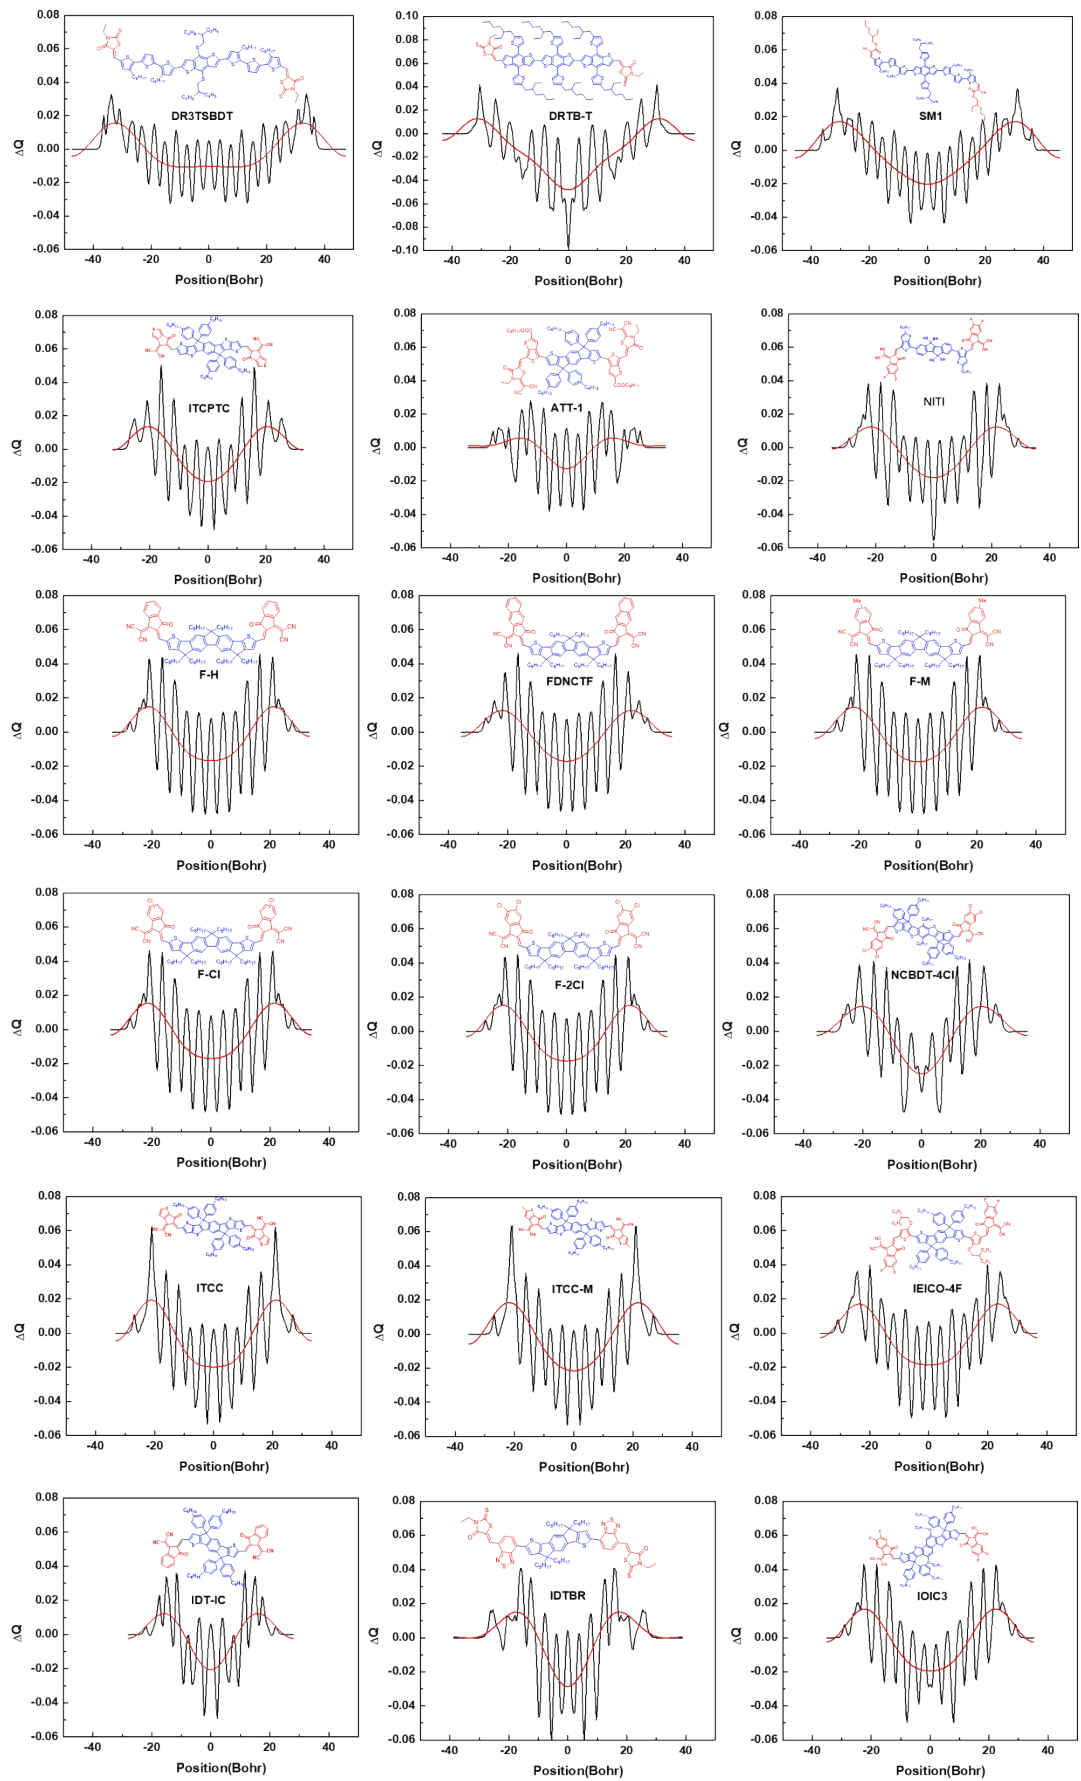

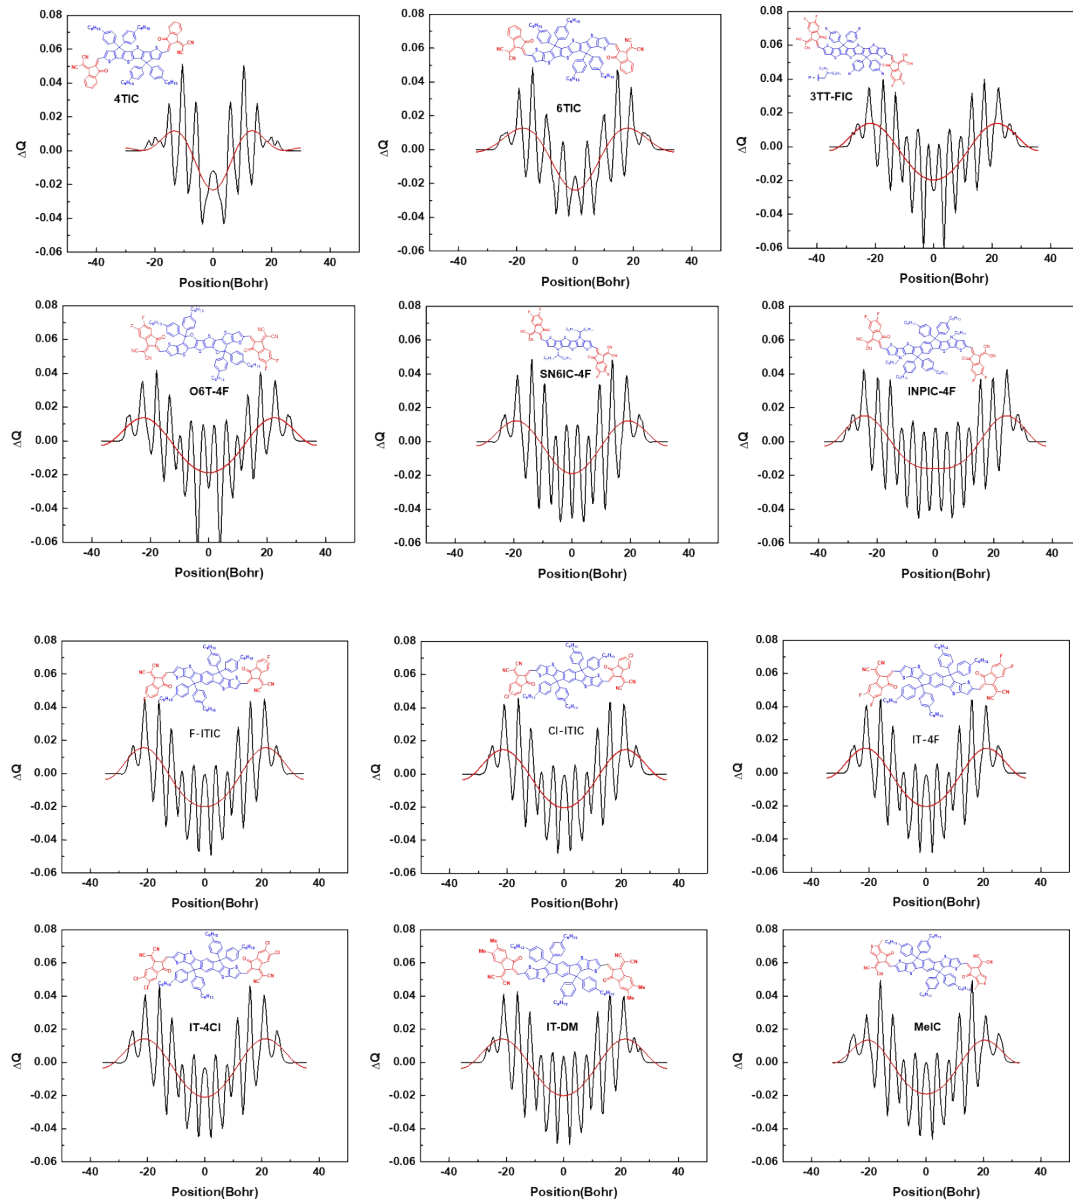

## 2. A semi-empirical model analysis for PCE prediction

2.1 For the semi-empirical analysis based on a single cell, the fundamental assumptions are made as follows:

- 1) An internal quantum efficiency (IQE) of 100% is considered for the whole absorption wavelengths.<sup>1</sup>
- 2) EQE is assumed to be same in the whole absorption range with a given value of 80% and  $FF$  is assumed to be 0.8.
- 3) In the discussion as follows, the optical gap of the subcell  $E_g$  ( $= 1240/\lambda_{\text{onset}}$ ) is defined as the narrower optical gaps of the donor-acceptor couples. Note, for the

fullerene based devices, the absorption onset is considered to be that of the donor materials. For the fullerene-free based devices, it referred to be that of material, either donor or acceptor, whichever has a narrower bandgap.<sup>2</sup>

Based on above assumptions, the three photovoltaic parameters  $V_{oc}$ ,  $J_{sc}$  and  $FF$  of a single cell is obtained as follows:

- 1) For a single cell with absorption onset  $\lambda$ , the  $J_{sc}$  of the cell could be obtained from equation 1 (Eq. 1).

$$J_{sc} = \int_{300}^{\lambda} \frac{q\lambda}{hc} \cdot E(\lambda) \cdot EQE(\lambda) \cdot d\lambda \quad (1)$$

where  $E(\lambda)$  is the spectral irradiance in AM 1.5G,  $\lambda$  is the absorption onset of the cell,  $h$  is Planck's constant,  $c$  is the speed of light and  $q$  is the elementary charge.

- 2) The  $V_{oc}$  of the cell is determined by the following Eq. 2.

$$V_{oc} = \frac{1}{q}(E_g - E_{loss}) = \frac{1}{q}\left(\frac{1240}{\lambda} - E_{loss}\right) \quad (2)$$

The  $E_{loss}$  are assumed to be 0.4-0.8 eV according to overall reported values.<sup>3</sup>

So for the single cell, the PCE can be calculated from the Eq. 3 under AM 1.5G light illumination.

$$\begin{aligned} PCE(\%) &= V_{oc} \cdot J_{sc} \cdot FF / P_{in} \\ &= \frac{1}{q}\left(\frac{1240}{\lambda} - E_{loss}\right) \int_{300}^{\lambda} \frac{q\lambda}{hc} \cdot E(\lambda) \cdot EQE(\lambda) \cdot d\lambda \cdot FF / P_{in} \end{aligned} \quad (3)$$

**2.2** For the semi-experimental analysis based on a 2-terminal monolithic tandem cell with two subcells connected in series, the detailed description has been reported in literature.<sup>4</sup> The Figure 7b in the ms is obtained under the given EQE of 80% and FF%.

## References:

1. S. H. Park, A. Roy, S. Beaupré, S. Cho, N. Coates, J. S. Moon, D. Moses, M. Leclerc, K. Lee, A. J. Heeger, *Nat. Photon.* 2009, **3**, 297-302.
2. S. Matthew Menke, Niva A. Ran, Guillermo C. Bazan, R. H. Friend, *Joule*, 2018, **2**, 25-35.
3. Z. Yao, X. Liao, K. Gao, F. Lin, X. Xu, X. Shi, L. Zuo, F. Liu, Y. Chen, A. K. Jen, *J. Am. Chem. Soc.* 2018, **140**, 2054-2057.
4. L. Meng, Y. Zhang, X. Wan, C. Li, X. Zhang, Y. Wang, X. Ke, Z. Xiao, L. Ding, R. Xia, H.-L. Yip, Y. Cao and Y. Chen, *Science*, 2018, **361**, 1094-1098.
